# Supplementary material
Source: publisher figshare collection journal article supplement (https://acs.figshare.com/ndownloader/files/5825283)

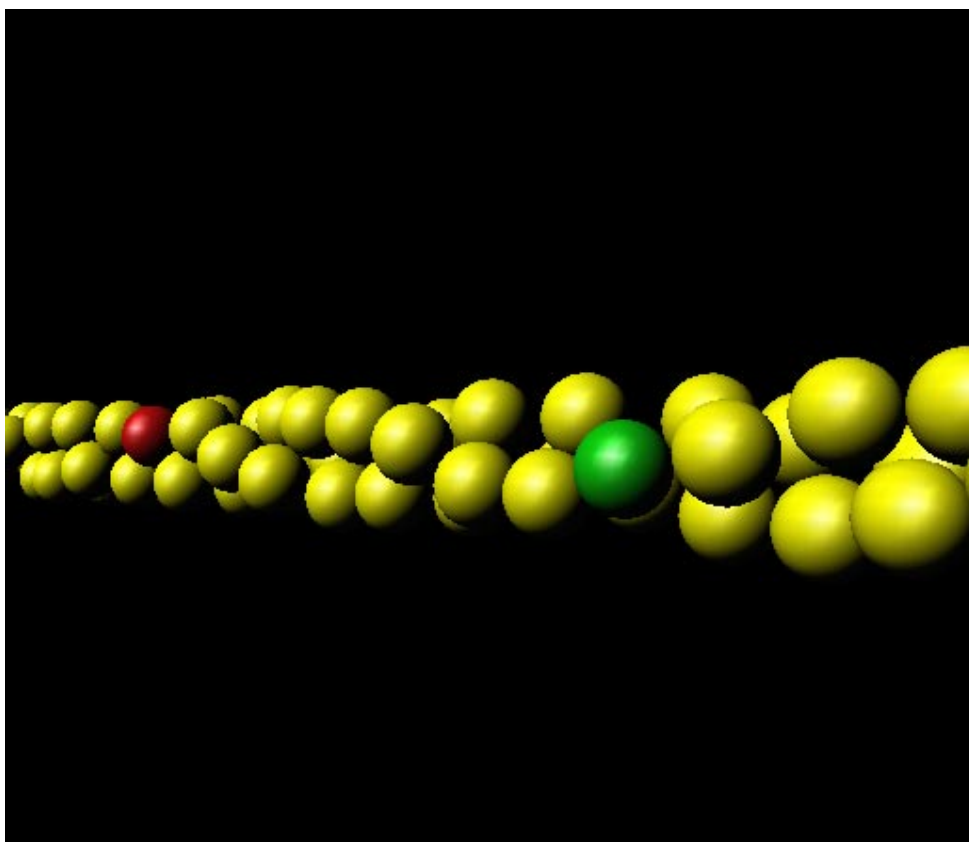

**Graphic for the Table of Contents**

Supplement: Supplementary file 1 [file 5825283]
